# Supplementary material for: Construction of a Triple-Gene Deletion Mutant of Orf Virus and Evaluation of Its Safety, Immunogenicity and Protective Efficacy
Source: MDPI journal article supplement (doi:10.3390/vaccines11050909), 2023-04-28
Supplement: s1 [file s1]

# Supplementary materials

Table S1. Primers used to generate and identify the recombinant viruses.

| Primers       | Sequence (5'–3')                                      | Descriptions                                            |
|---------------|-------------------------------------------------------|---------------------------------------------------------|
| 121-hm1 F     | CGACATCGCACACAAATGAAGGACA                             | Used to amplify the left arm of rGS14ΔCBPΔGIFΔ121-EGFP  |
| 121-hm1 R     | ACGTAGAAGACCAGGAAACAG<br>GGTTGTGTGGGCCACAGAGTTGAGT    |                                                         |
| 121-hm2 F     | ACTCATCAATGTATCTTAAGGCGTGAAAGTGCGTTTTTCTGTAAT<br>GTGA | Used to amplify the right arm of rGS14ΔCBPΔGIFΔ121-EGFP |
| 121-hm2 R     | CGTAGCAGAACAGCGACAGC                                  |                                                         |
| 121-EGFP F    | ACTCAACTCTGTGGCCACACAACC<br>CTGTTTCCTGGTCTTCTACGT     | Used to amplify the EGFP marker gene                    |
| 121-EGFP R    | TCACATTACAGAAAAACGCACTTTCACGCCTTAAGATACATTGAT<br>GAGT |                                                         |
| 121-hm1-hm2 F | ACTCTGTGGCCACACAACCGAAAGTGCGTTTTTCTGTAAT              | Used to amplify the right arm of rGS14ΔCBPΔGIFΔ121      |
| 121-hm2-hm1 R | TTACAGAAAAACGCACTTTCGGTTGTGTGGGCCACAGA                | Used to amplify the left arm of rGS14ΔCBPΔGIFΔ121       |
| 121 F         | TAGGTGCGTTCAGAGGCG                                    | Used to identify the 121 gene in ORFV                   |
| 121 R         | CGTAGCAGAACAGCGACAGC                                  |                                                         |

Table S2. Clinical scoring sheet.

|                              | absence<br>(0') | mild or small<br>number<br>(1') | moderate or<br>medium number<br>(2') | severe or high<br>number<br>(3') |
|------------------------------|-----------------|---------------------------------|--------------------------------------|----------------------------------|
| hyperemia                    |                 |                                 |                                      |                                  |
| vesicles and/or<br>pustules  |                 |                                 |                                      |                                  |
| scabs                        |                 |                                 |                                      |                                  |
| exudation<br>and/or bleeding |                 |                                 |                                      |                                  |

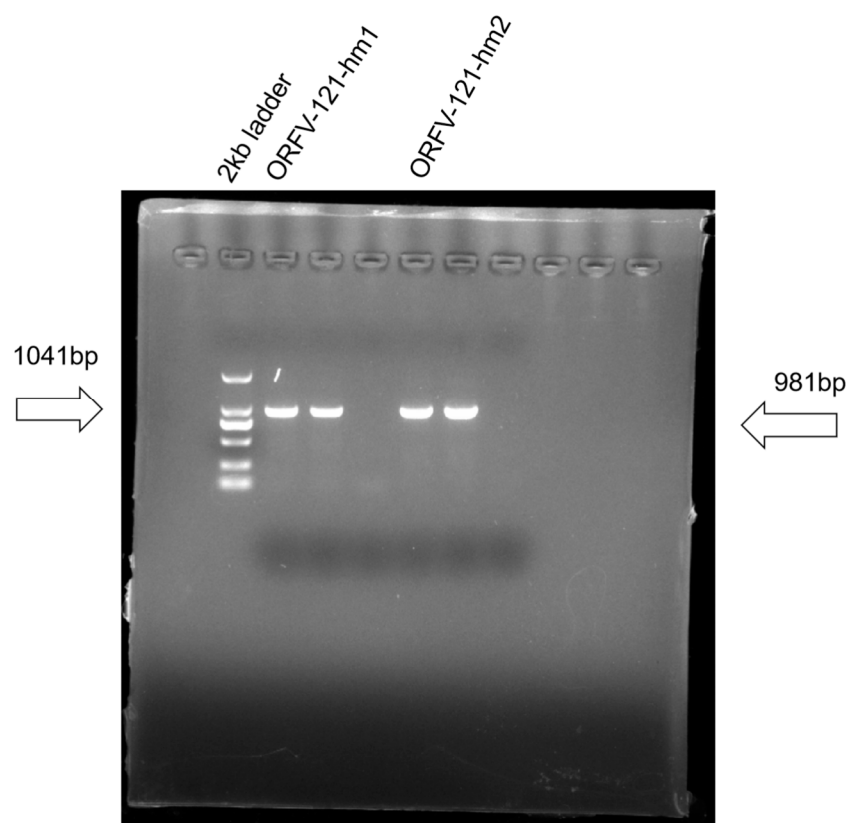

A

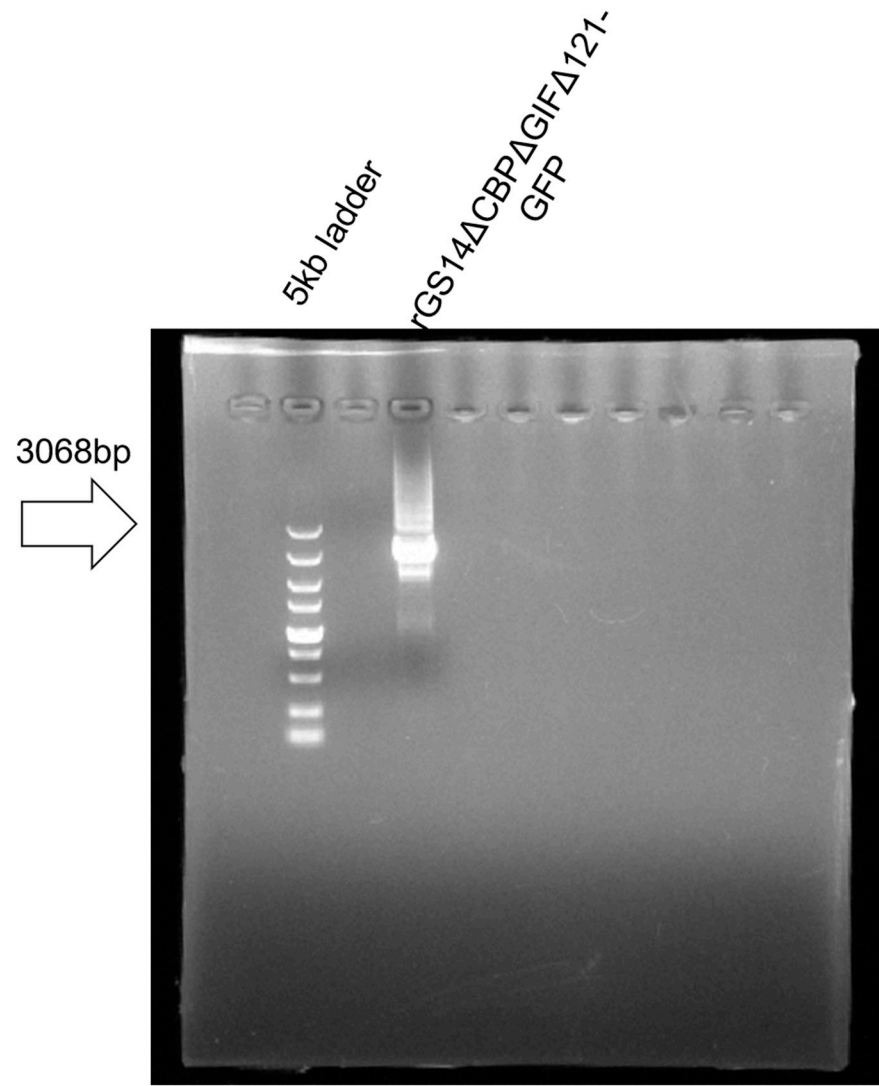

B

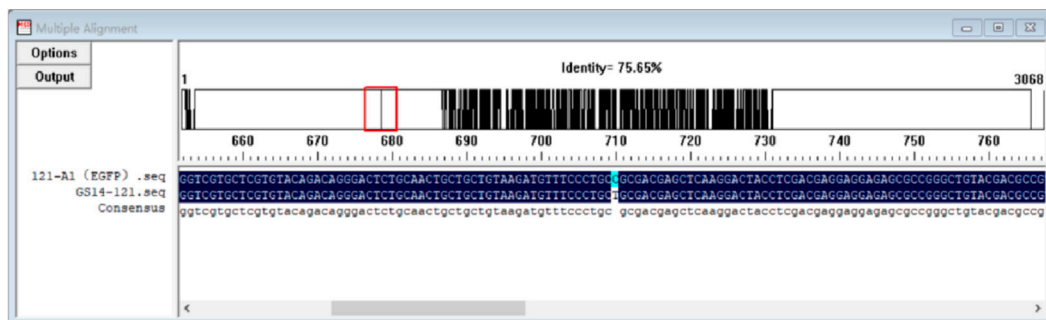

C

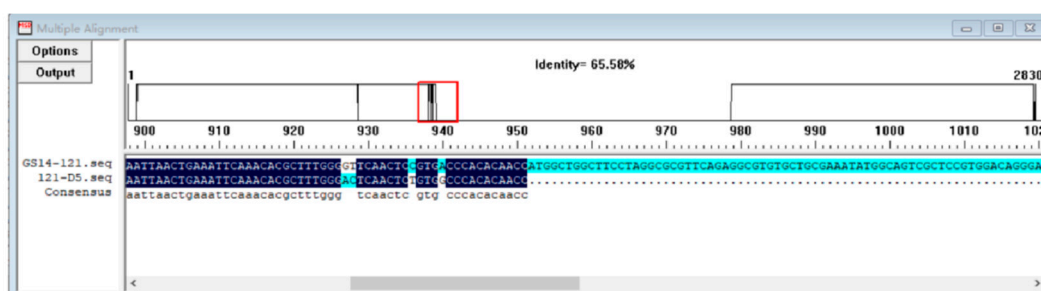

D

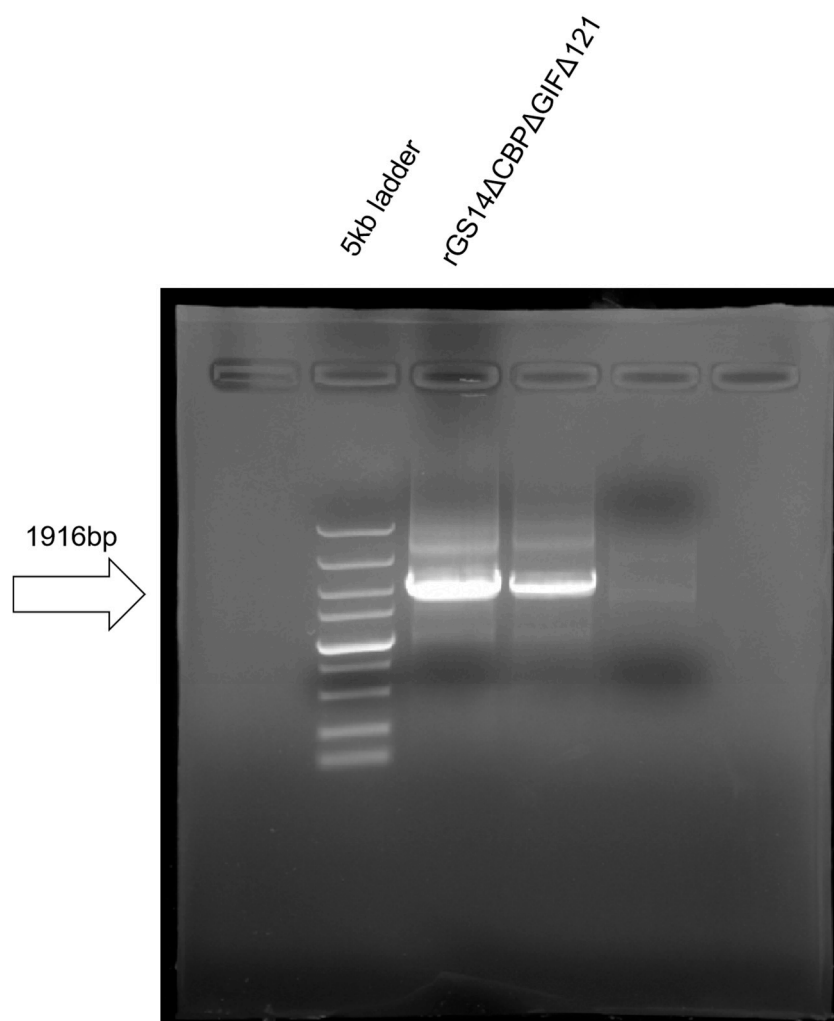

E

**Figure S1.** Partial identification results of recombinant virus rGS14ΔCBPΔGIFΔ121 construct. **A:** Bands showed the rGS14ΔCBPΔGIF containing 121 left homology arm and right homology arm.; **B:** The band showed the generation of rGS14ΔCBPΔGIFΔ121-GFP. **C:** Sequencing result of rGS14ΔCBPΔGIFΔ121-GFP compared with 121 gene of GS14. **D:** Sequencing result of rGS14ΔCBPΔGIFΔ121 compared with GS14-121. **E:** The band showed the construction of rGS14ΔCBPΔGIFΔ121
